# Supplementary material for: Controlling genetic heterogeneity in gene-edited hematopoietic stem cells by single-cell expansion
Source: PubMed Central journal article supplement (PMC10338855; doi:10.1016/j.stem.2023.06.002), 2023-07-06
Supplement: mmc1.pdf [file mmc1.pdf]

**Cell Stem Cell, Volume 30**

**Supplemental Information**

**Controlling genetic heterogeneity in gene-edited  
hematopoietic stem cells by single-cell expansion**

**Hans Jiro Becker, Reiko Ishida, Adam C. Wilkinson, Takaharu Kimura, Michelle Sue Jann Lee, Cevayir Coban, Yasunori Ota, Yosuke Tanaka, Meike Roskamp, Tsubasa Sano, Arinobu Tojo, David G. Kent, and Satoshi Yamazaki**

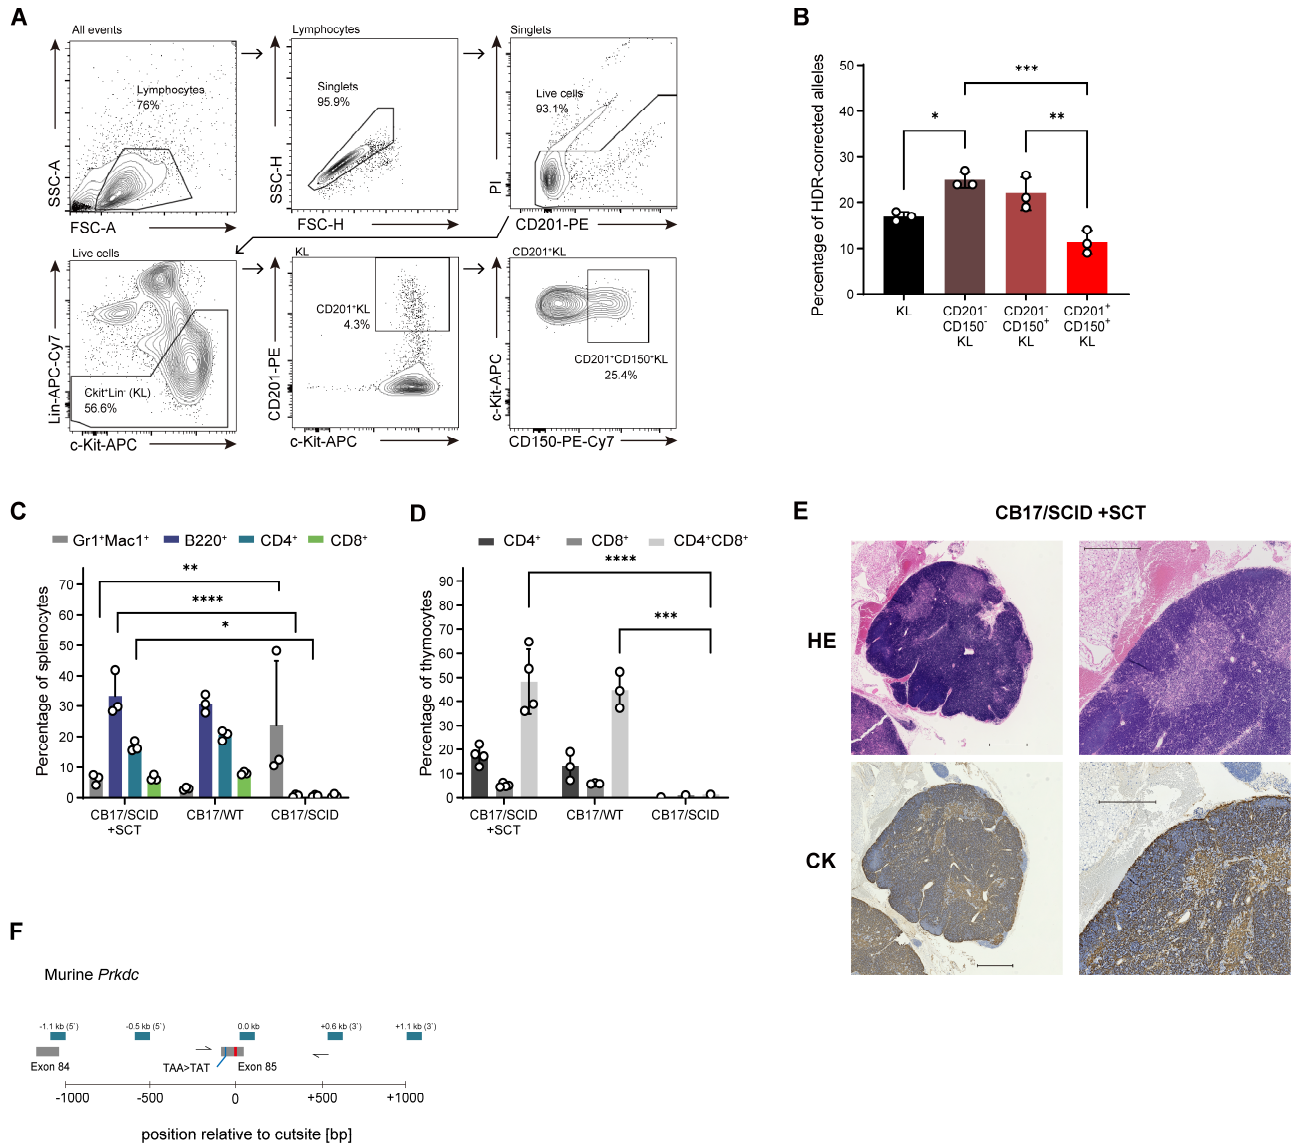

**Fig. S1, Becker et al.**

**Figure S1. Functional correction of *Prkdc*<sup>scid</sup> HSCs.** Related to Fig. 1.

(A) Gating strategy for the isolation of CD201<sup>+</sup>CD150<sup>+</sup>KL cells from CB17/SCID mouse BM. (B) Frequency of HDR<sup>+</sup> alleles within phenotypically defined HSPC populations 7 days post gene editing (n=3 cultures). (C) Immunophenotype of splenocytes 20 weeks post-SCT (n=3 mice per group). (D) Frequencies of double (CD4<sup>+</sup>CD8<sup>+</sup>) and single positive (CD4<sup>+</sup> and CD8<sup>+</sup>) thymocytes 20 weeks post-SCT. Data points represent individual mice. (E) Sections of thymi isolated from a CB17/SCID recipient transplanted with gene edited HSCs 20 weeks post-SCT. Upper panel: hematoxylin-eosin (HE), lower panel: cytokeratin (CK) stains; Magnified section of left panels (scale bar: 500  $\mu$ m) shown on right (scale bar: 300  $\mu$ m). (F) Design of ddPCR probes for copy number assays. Blue boxes: probes; red line: cut site; blue line: targeted mutation. Black arrows: PCR primers.

One-(B) and two-way(C, D) ANOVA with Tukey's multiple comparison test.

Error bars represent SD. \*P<0.05, \*\*P<0.01, \*\*\*P<0.001, \*\*\*\*P<0.0001.

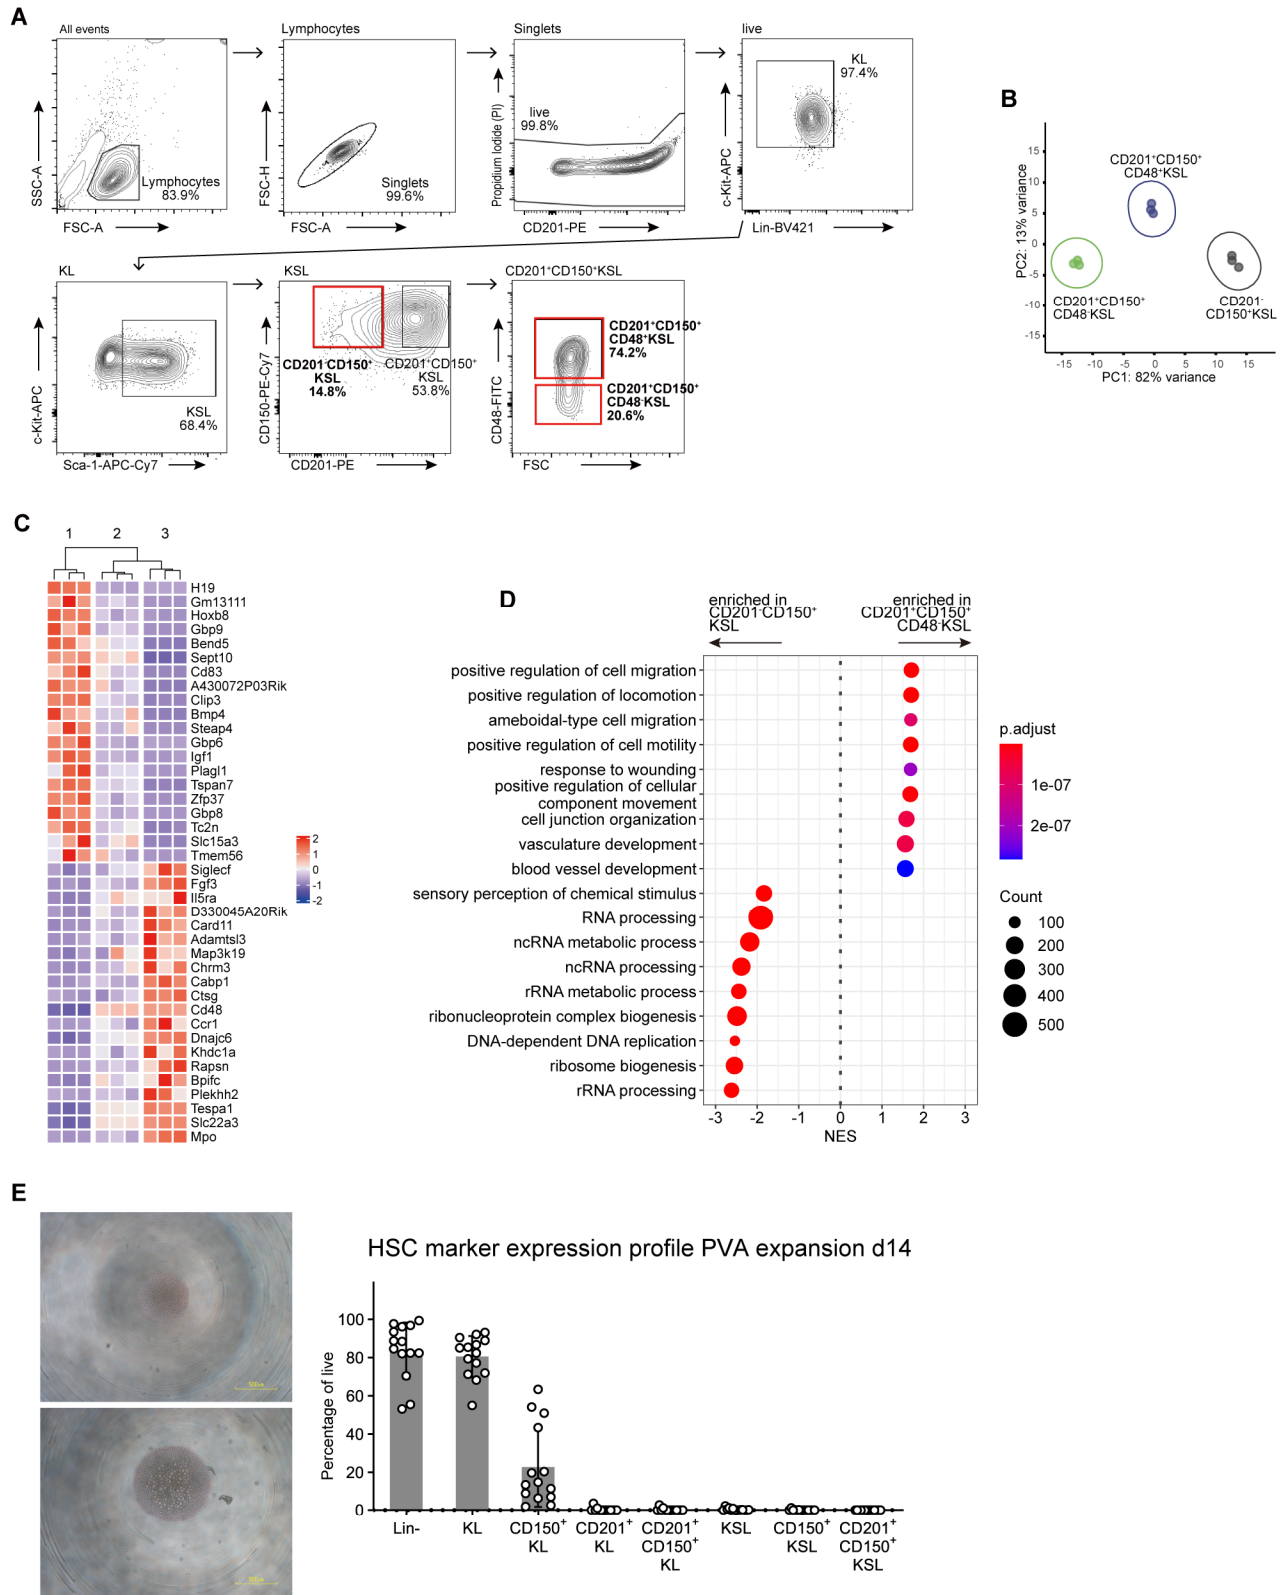

Fig. S2, Becker et al.



**Figure S2. Transcriptional and immune phenotype of cultured, gene-edited HSCs.** Related to Fig. 2.

(A) Gating strategy applied for the isolation of CD201<sup>+</sup>CD150<sup>+</sup>CD48<sup>-</sup>KSL, CD201<sup>+</sup>CD150<sup>+</sup>CD48<sup>+</sup>KSL and CD201<sup>-</sup>CD150<sup>+</sup>KSL cells for RNA-seq analysis on day 10 of bulk expansion. (B) Principal component analysis (PCA) of CD201<sup>+</sup>CD150<sup>+</sup>CD48<sup>-</sup>KSL, CD201<sup>+</sup>CD150<sup>+</sup>CD48<sup>+</sup>KSL and CD201<sup>-</sup>CD150<sup>+</sup>KSL cells (n=3 replicates). (C) Heatmap showing the top 40 differentially regulated (up- and down-regulated) genes in CD201<sup>+</sup>CD150<sup>+</sup>CD48<sup>-</sup>KSL (1) and CD201<sup>-</sup>CD150<sup>+</sup>KSL (3) populations, with expression data of CD201<sup>+</sup>CD150<sup>+</sup>CD48<sup>+</sup>KSL (2) cells (n=3 replicates). (D) Nine most significantly enriched GO terms (biological process) in CD201<sup>+</sup>CD150<sup>+</sup>CD48<sup>-</sup> and CD201<sup>-</sup>CD150<sup>+</sup>KSL populations. (E) Expansion of precultured and cloned CD201<sup>+</sup>CD150<sup>+</sup>CD48<sup>-</sup>KSL cells. CD34<sup>-</sup>CD150<sup>+</sup>KSL cells were isolated and expanded for 10 days before cloning. The colonies generated from these clones in PVA-based expansion medium were analyzed 14 days post-sort. Left: Representative images of single clone-derived HSC colonies 13 days post-sort. Right: Phenotypic fractions within expanded colonies, as a percentage of live cells (n=14).

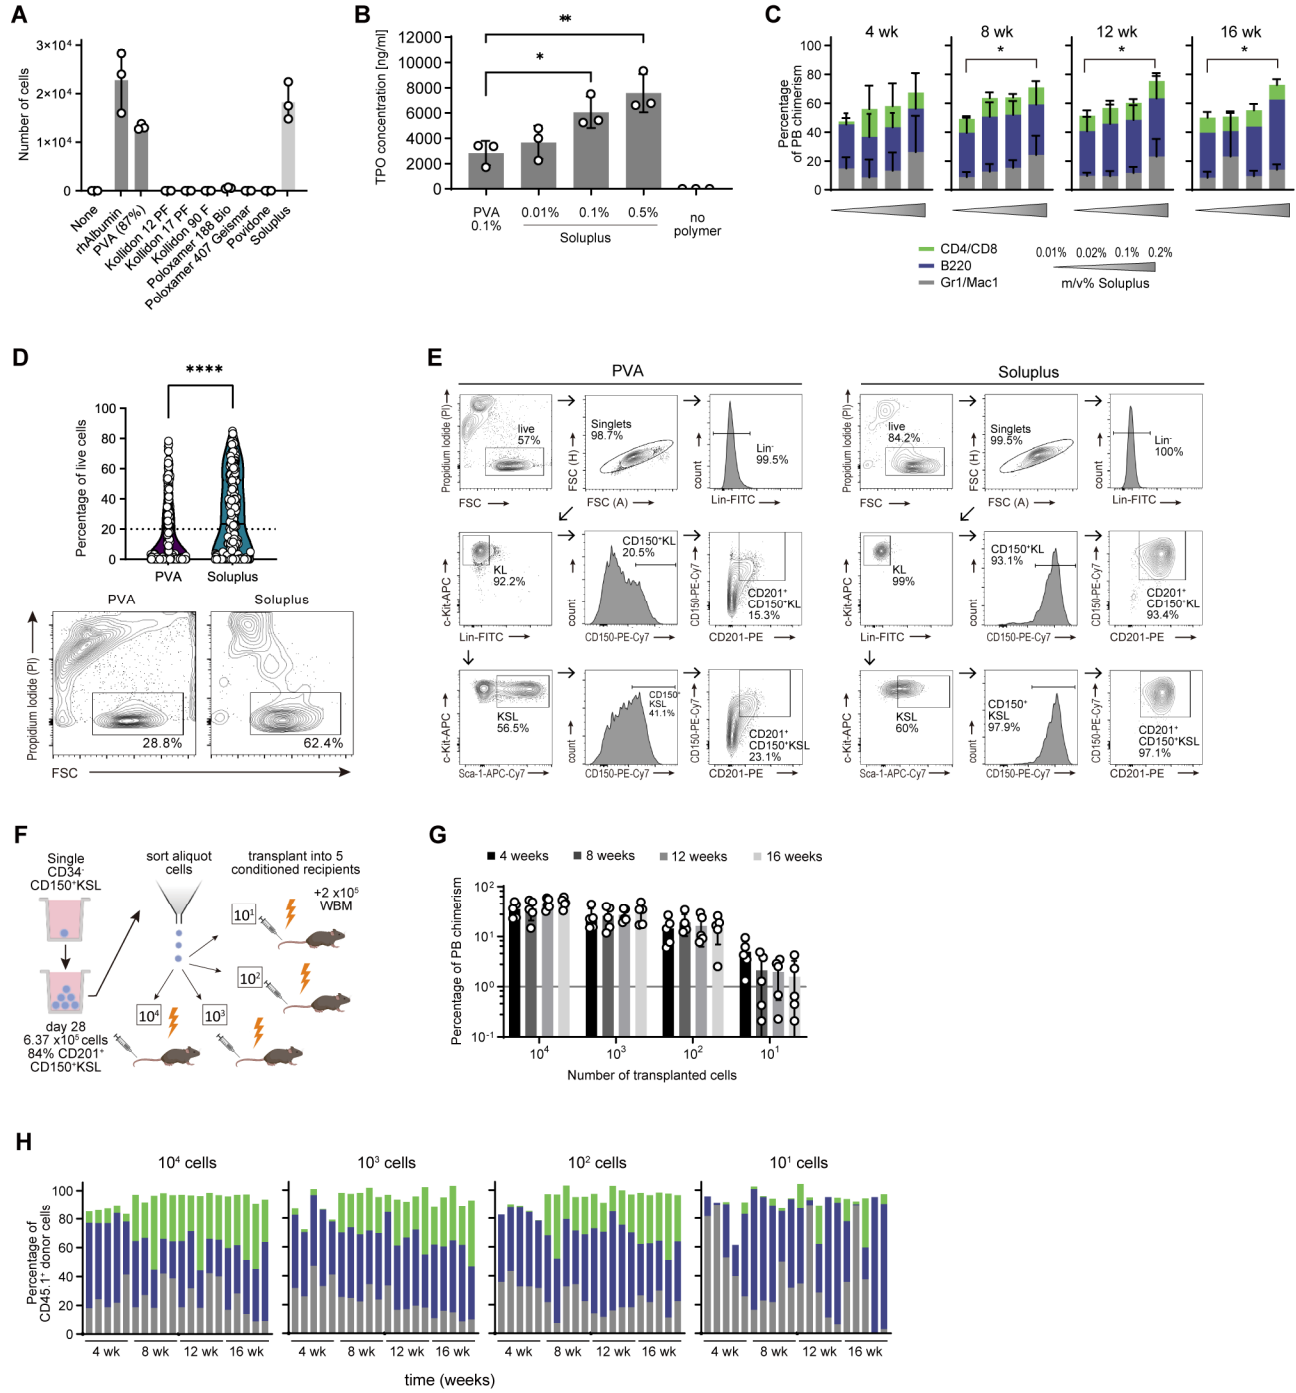

Fig. S3, Becker et al.

**Figure S3. Titration of Soluplus supplementation and immune phenotype of Soluplus-expanded HSC clones.** Related to Fig. 3.

(A) Albumin replacement polymer screening for *ex vivo* expansion of murine HSCs. 50 freshly isolated C57BL/6 CD34<sup>+</sup>KSL cells were cultured in media supplemented with the indicated polymers for 7 days. Recombinant human albumin and PVA (87% hydrolyzed) served as positive controls. Concentration of all polymers was 0.1% (m/v). Total cells were counted to assess growth support (n=3 cultures). (B) Murine TPO ELISA. Ham's F12 with 100 ng/ml TPO was supplemented with the indicated polymers and cultured for 3 days. ANOVA with Tukey's multiple comparison test. (n=3). (C) Soluplus supplementation titration assay. Fifty C57BL/6-Ly5.1 (CD45.1<sup>+</sup>) CD34<sup>+</sup>CD150<sup>+</sup>KSL cells grown in titrated concentrations of Soluplus (0.01%, 0.02%, 0.1% and 0.2%) were expanded for 14 days and split-transplanted into CD45.2<sup>+</sup> recipients (n=4 to 9 per group) against 2 x10<sup>5</sup> CD45.1<sup>+</sup>/CD45.2<sup>+</sup> whole bone marrow competitor cells. Peripheral blood (PB) chimerism and lineage distribution is shown. Supplementation with 0.2% Soluplus produced mild micelle formation in cultures, which was not toxic, but occasionally obstructed the visibility of cells. Two-way ANOVA with Tukey's multiple comparison test. (D) Left panel: Percentage of viable cells in HSC colonies grown from freshly isolated single CD34<sup>+</sup>CD150<sup>+</sup>KSL cells after 19 days of culture in PVA (n=288)- and Soluplus (n=290)-based media, as evaluated by flow cytometry (%PI of all events). Right panel: Representative FACS plots of single-cell derived colonies (day 19). Two-tailed Mann-Whitney test. (E) Representative FACS plots of individual clones expanded in PVA- and Soluplus-supplemented media. (F) Schematic of limiting dilution assay (LDA). (G) Donor PB chimerism four to 16 weeks post-SCT (5 mice per group). Cutoff level (1%) denoted with gray line. (H) PB lineage distribution of CD45.1<sup>+</sup> donor cells. Each bar represents an individual recipient.

Error bars represent SD. \*P<0.05, \*\*P<0.01, \*\*\*P<0.001, \*\*\*\*P<0.0001.

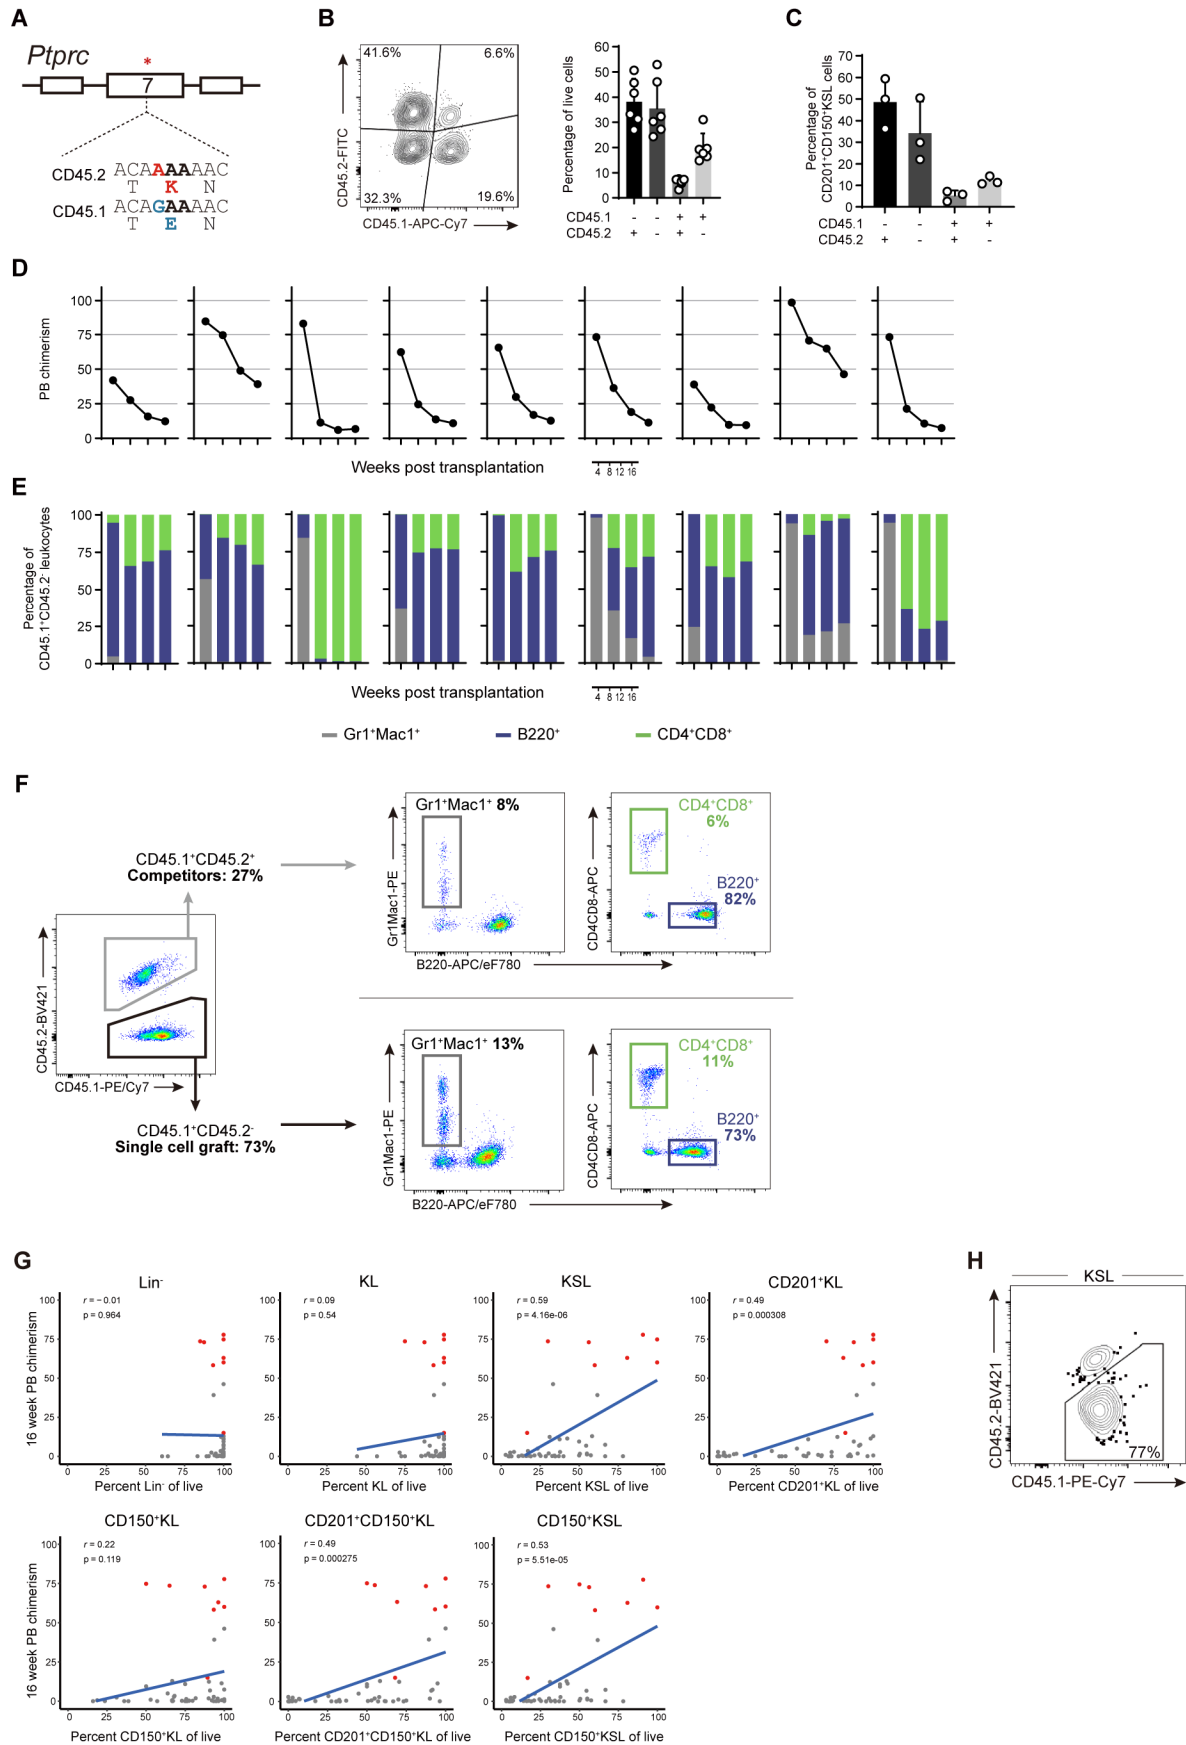

**Fig. S4, Becker et al.**

**Figure S4. *Ptprc* allele conversion efficiency and single clone transplantation assays.** Related to Fig. 4. (A) Genomic context of the *Ptprc*<sup>a</sup> and *Ptprc*<sup>b</sup> alleles. White boxes: exons. \*denotes site of SNP. (B) Distribution of CD45 phenotypes among live cells 4 days post-editing. Representative FACS plot (left) and summary data (right, n=6 cultures). (C) Distribution of CD45 phenotypes among CD201<sup>+</sup>CD150<sup>+</sup>KSL cells 4 days post-editing (n=3 cultures). (D-E) CD45.1<sup>+</sup> chimerism (D) and lineage distribution (E) in single recipients that did show LT chimerism  $\geq 5\%$  but did not display multilineage distribution (defined as each lineage  $\geq 5\%$ ). Four to 16 weeks post-SCT. Related to Fig. 4d-e. (F) Peripheral blood analysis of one of the transplanted mice from Fig. 4D at 16 weeks post-SCT. The single cell graft (CD45.1<sup>+</sup>CD45.2<sup>-</sup>) as well as the whole bone marrow competitor graft (CD45.1<sup>+</sup>CD45.2<sup>+</sup>) contribute similar amounts to the three lineages examined, suggesting that there is no lineage bias in the expanded HSC graft. (G) Correlation plots of different expansion culture phenotypes versus LT donor chimerism (16 weeks). Red dots indicate multilineage and LT repopulating clones. Pearson correlation. (H) Bone marrow CD45.1<sup>+</sup> donor chimerism within the KSL compartment of a representative primary recipient.

Error bars represent SD.

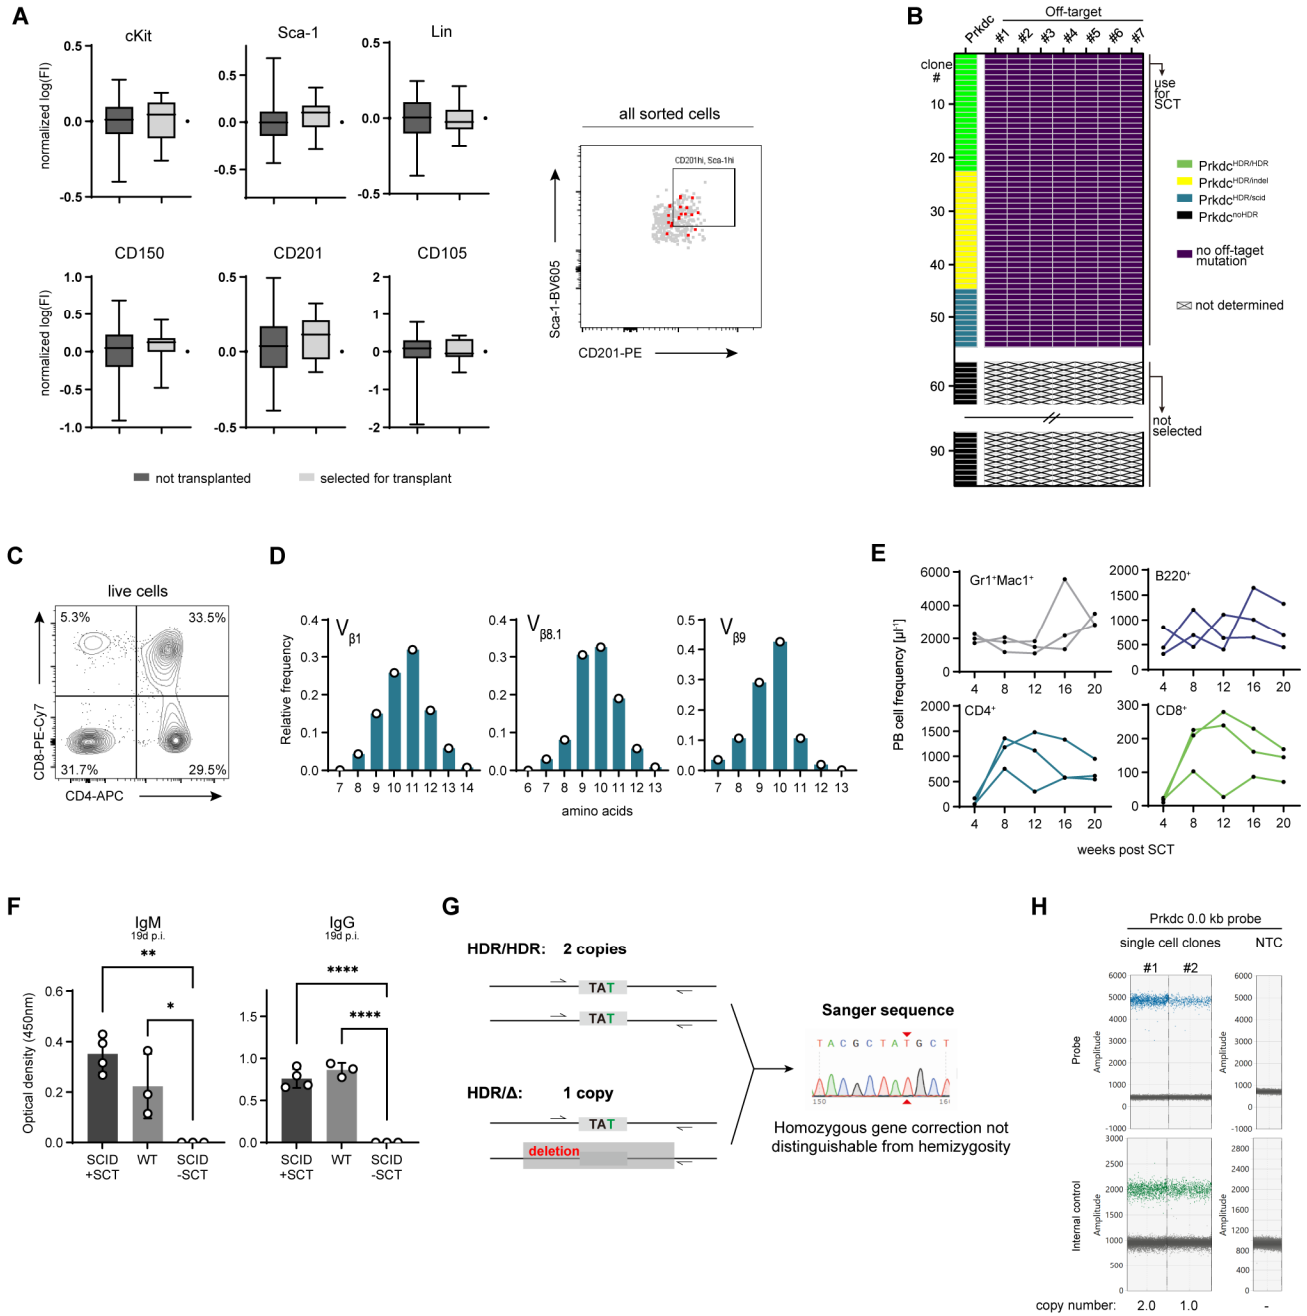

Fig. S5, Becker et al.

**Figure S5. Functional rescue of SCID immunodeficiency with edited and single- cell expanded HSC graft.** Related to Fig. 5.

(A) Quantification of markers associated with HSC expansion. Marker expression at sorting was compared between clones that were transplanted after the expansion period ( $CD201^+CD150^+KL \geq 10\%$ , HDR<sup>+</sup>) and those that were not (remaining clones). Left: Fluorescence intensity (FI) measured at sorting. Data presented as log-transformed and normalized to mean. Box plots with whiskers showing minimum and maximum. Right: Representative FACS sorting plot, transplanted clones indicated in red. (B) Genotypes of all profiled candidate clones (n=96). (C) Representative FACS plot showing frequencies of double ( $CD4^+CD8^+$ ) and single positive ( $CD4^+$  and  $CD8^+$ ) cells from the thymus of a CB17/SCID recipient 20 weeks after transplantation. (D) CDR3 length spectratype analysis of the Tcrb-V1, -V8.1 and -V9 genes in splenic  $CD4^+$  cells. Each bar represents the relative frequency of a CDR3 length species (n=1 mouse). (E) Absolute PB cell frequencies in CB17/SCID recipients. (F) Serum levels of NIP<sub>30</sub>-specific IgG and IgM 19 days after immunization (CB17/SCID+SCT: n=4 mice; CB17/WT and treatment-naïve CB17/SCID: n=3). (G) LD schematic (H) Example data showing ddPCR quantification of *Prkdc* alleles (0.0kb probe) in two clones.

One-(E) and two-way (A, B) ANOVA with Tukey's multiple comparison test.

Error bars represent SD. \*P<0.05, \*\*P<0.01, \*\*\*P<0.001, \*\*\*\*P<0.0001.

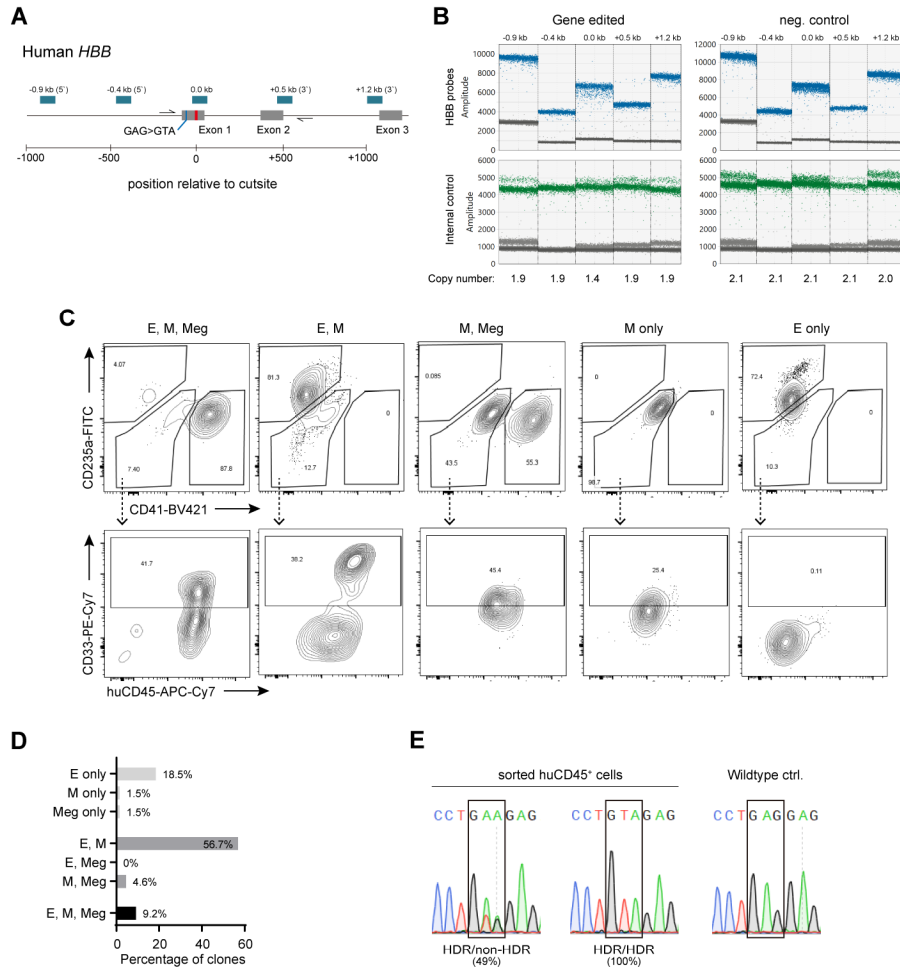

Fig. S6, Becker et al.



**Figure S6. Expansion and profiling of single, *HBB* gene-edited human HSCs.** Related to Fig. 6.

(A) Editing strategy of the *HBB* locus with ddPCR probes for copy number assays. Blue boxes: ddPCR probes; red line: cut site; blue line: targeted mutation. (B) Example ddPCR quantification data of bulk gene edited CB HSCs (left) and negative control (unedited) cells. (C) Example FACS plots showing colony differentiation outcomes for erythroid (E, CD235a<sup>+</sup>), myeloid (M, CD33<sup>+</sup>) and megakaryocytic (Meg, CD41<sup>+</sup>)-containing colonies. A lineage was defined positive if more than ten events were detected in the in the relevant gate. (D) Summary of single huHSPC differentiation outcomes. E, erythroid; M, Myeloid; Meg, megakaryocytic. (n=65). (E) Example sequencing traces from sorted huCD45<sup>+</sup> cells isolate from NOG recipients transplanted with HPSCs heterozygous (*HBB*<sup>HDR/non-HDR</sup>) or homozygous (*HBB*<sup>HDR/HDR</sup>) for the SCD mutation. Healthy control showing wild-type sequence (right).

| # | Hit                                        | Permutation       | Mismatches | Position (GRCm38)        | strand | Gene           |
|---|--------------------------------------------|-------------------|------------|--------------------------|--------|----------------|
|   | CTTACCAAGTTATAACAGCTNGG                    | -                 | -          | -                        | -      | Prkdc_gRNA1    |
| 1 | ATTACTT <b>T</b> AGTTATAACAGCTGGG          | No indel          | 3          | Chr5:57647418-57647440   | -      | 4932441J04Rik  |
| 2 | CTTA <b>A</b> AAAGT <b>C</b> ATAACAGCTGGG  | No indel          | 3          | Chr5:21558299-21558321   | -      | Fbx113; Lrrc17 |
| 3 | CTTA- <b>TAA</b> CTTATAACAGCTAGG           | Del 15, or Del 16 | 2          | Chr14:96347342-96347363  | -      | Klh1           |
| 4 | CTTA <b>A</b> CAA- <b>TT</b> CTAACAGCTGGG  | Del 12            | 2          | Chr8:73726599-73726620   | +      | No known gene  |
| 5 | CTTAG <b>G</b> CAA- <b>TTT</b> TAACAGCTCGG | Del 12            | 2          | Chr1:24130829-24130850   | -      | No known gene  |
| 6 | CTT <b>C</b> CCAAG- <b>TAG</b> AACAGCTGGG  | Del 10, or Del 11 | 2          | Chr4:54112620-54112641   | +      | No known gene  |
| 7 | CTT <b>C</b> CCAAG- <b>TAT</b> TACAGCTTGG  | Del 10, or Del 11 | 2          | Chr2:140296967-140296988 | +      | Sel12          |

**Supplemental Table S1. Candidate off-target sites.** Related to Fig. 1.

Candidate off-target sites of the guide RNA targeting *Prkdc* were identified using the COSMID algorithm. Mismatches and permutations in the seed region are indicated in red.

The first row shows the seed sequence and PAM of the sgRNA used (Prkdc\_gRNA1).

| Chr           | Position  | Reference                             | Allele              | Count | Coverage | Freq. | Control count | Control coverage | Transcript affected                                                   | AA change in longest transcript | Gene                              |
|---------------|-----------|---------------------------------------|---------------------|-------|----------|-------|---------------|------------------|-----------------------------------------------------------------------|---------------------------------|-----------------------------------|
| <b>Indels</b> |           |                                       |                     |       |          |       |               |                  |                                                                       |                                 |                                   |
| chr1          | 85504851  | CACACACACACA<br>CACACACACACA<br>CACAG | C                   | 11    | 39       | 28.2% | 0             | 13               | ENSMUST00000178024.2;<br>c.257_284delCACACACACACACACACACAC<br>ACACAGA | p.Thr86fs                       | ENSMUSG00000094127; G530012D18Rik |
| chr1          | 85504943  | GAC                                   | G                   | 34    | 101      | 33.7% | 0             | 39               | ENSMUST00000178024.2; c.349_350delCA                                  | p.Gln117fs                      | ENSMUSG00000094127; G530012D18Rik |
| chr2          | 98497361  | CAAGAAAACCTGA<br>AAATCA               | C                   | 75    | 111      | 67.6% | 0             | 449              | ENSMUST00000099683.2;<br>c.239_255delTGATTTTCAGTTTTCTT                | p.Leu80fs                       | ENSMUSG00000075014; Gm10800       |
| chr4          | 126059360 | TC                                    | T                   | 6     | 34       | 17.6% | 0             | 20               | ENSMUST00000080919.12; c.2684delG                                     | p.Arg895fs                      | ENSMUSG00000043962; Thrap3        |
| chr9          | 3002239   | A                                     | ATTTCAT<br>TTTTACAT | 2     | 16       | 12.5% | 0             | 18               | ENSMUST00000151376.3;<br>c.575_576insATTTTCTCATTTTTAC                 | p.Phe194fs                      | ENSMUSG00000091028; Gm10722       |
| chr9          | 3025119   | C                                     | CA                  | 2     | 15       | 13.3% | 0             | 11               | ENSMUST00000099046.4; c.583dupA                                       | p.Ser195fs                      | ENSMUSG00000095186; Gm10718       |
| chr17         | 23530080  | TC                                    | T                   | 56    | 355      | 15.8% | 0             | 93               | ENSMUST00000168033.3; c.325delG                                       | p.Glu109fs                      | ENSMUSG00000091945; Vmn2r114      |
| chr17         | 23530164  | GA                                    | G                   | 184   | 300      | 61.3% | 0             | 93               | ENSMUST00000168033.3; c.241delT                                       | p.Ser81fs                       | ENSMUSG00000091945; Vmn2r114      |
| <b>SNPs</b>   |           |                                       |                     |       |          |       |               |                  |                                                                       |                                 |                                   |
| chr1          | 85504886  | A                                     | G                   | 15    | 46       | 32.6% | 0             | 18               | ENSMUST00000178024.2; c.290A>G                                        | p.Glu97Gly                      | ENSMUSG00000094127; G530012D18Rik |
| chr1          | 85504923  | G                                     | C                   | 33    | 78       | 42.3% | 0             | 36               | ENSMUST00000178024.2; c.327G>C                                        | p.Glu109Asp                     | ENSMUSG00000094127; G530012D18Rik |
| chr1          | 85504941  | G                                     | C                   | 34    | 93       | 36.6% | 0             | 39               | ENSMUST00000178024.2; c.345G>C                                        | p.Glu115Asp                     | ENSMUSG00000094127; G530012D18Rik |
| chr1          | 85504970  | C                                     | T                   | 43    | 124      | 34.7% | 0             | 39               | ENSMUST00000178024.2; c.374C>T                                        | p.Ala125Val                     | ENSMUSG00000094127; G530012D18Rik |
| chr1          | 85504990  | A                                     | G                   | 42    | 125      | 33.6% | 0             | 39               | ENSMUST00000178024.2; c.394A>G                                        | p.Ile132Val                     | ENSMUSG00000094127; G530012D18Rik |
| chr1          | 133284294 | G                                     | A                   | 23    | 91       | 25.3% | 0             | 63               | ENSMUST00000094556.3; c.658G>A                                        | p.Glu220Lys                     | ENSMUSG00000070645; Ren1          |
| chr2          | 98492825  | T                                     | G                   | 11    | 52       | 21.2% | 0             | 23               | ENSMUST00000099684.4; c.244T>G                                        | p.Cys82Gly                      | ENSMUSG00000075015; Gm10801       |
| chr2          | 98497422  | T                                     | G                   | 1009  | 1036     | 97.4% | 0             | 2036             | ENSMUST00000099683.2; c.220A>C                                        | p.Ser74Arg                      | ENSMUSG00000075014; Gm10800       |
| chr3          | 98334623  | G                                     | T                   | 2     | 11       | 18.2% | 0             | 12               | ENSMUST00000056096.15; c.387G>T                                       | p.Glu129Asp                     | ENSMUSG00000050064; Zfp697        |
| chr4          | 126059371 | C                                     | T                   | 6     | 34       | 17.6% | 0             | 27               | ENSMUST00000080919.12; c.2674G>A                                      | p.Gly892Ser                     | ENSMUSG00000043962; Thrap3        |
| chr4          | 126059400 | C                                     | T                   | 4     | 23       | 17.4% | 0             | 23               | ENSMUST00000080919.12; c.2645G>A                                      | p.Arg882Gln                     | ENSMUSG00000043962; Thrap3        |
| chr7          | 11775508  | T                                     | G                   | 4     | 18       | 22.2% | 0             | 12               | ENSMUST00000227320.2; c.283T>G                                        | p.Cys95Gly                      | ENSMUSG00000095864; Vmn1r77       |
| chr7          | 11775524  | C                                     | T                   | 7     | 18       | 38.9% | 0             | 13               | ENSMUST00000227320.2; c.299C>T                                        | p.Ala100Val                     | ENSMUSG00000095864; Vmn1r77       |
| chr7          | 11775731  | A                                     | T                   | 4     | 23       | 17.4% | 0             | 23               | ENSMUST00000227320.2; c.506A>T                                        | p.Tyr169Phe                     | ENSMUSG00000095864; Vmn1r77       |
| chr9          | 3000927   | C                                     | A                   | 2     | 11       | 18.2% | 0             | 12               | ENSMUST00000151376.3; c.6C>A                                          | p.Cys2*                         | ENSMUSG00000091028; Gm10722       |
| chr9          | 3006907   | A                                     | C                   | 3     | 15       | 20.0% | 0             | 11               | ENSMUST00000179881.2; c.631A>C                                        | p.Asn211His                     | ENSMUSG00000096385; Gm11168       |
| chr9          | 3025133   | C                                     | T                   | 2     | 14       | 14.3% | 0             | 11               | ENSMUST00000099046.4; c.596C>T                                        | p.Ser199Leu                     | ENSMUSG00000095186; Gm10718       |

|       |           |   |   |     |     |       |   |    |                                  |              |                              |
|-------|-----------|---|---|-----|-----|-------|---|----|----------------------------------|--------------|------------------------------|
| chr11 | 115895814 | C | A | 4   | 16  | 25.0% | 0 | 11 | ENSMUST00000106458.2; c.4199C>A  | p.Pro1400Gln | ENSMUSG00000020758; Itgb4    |
| chr15 | 71335125  | G | T | 16  | 97  | 16.5% | 0 | 37 | ENSMUST00000022953.10; c.2068C>A | p.Pro690Thr  | ENSMUSG00000036800; Fam135b  |
| chr17 | 23530099  | T | C | 236 | 352 | 67.0% | 0 | 93 | ENSMUST00000168033.3; c.307A>G   | p.Lys103Glu  | ENSMUSG00000091945; Vmn2r114 |
| chr17 | 23530105  | T | G | 230 | 346 | 66.5% | 0 | 93 | ENSMUST00000168033.3; c.301A>C   | p.Ile101Leu  | ENSMUSG00000091945; Vmn2r114 |
| chr17 | 23530113  | C | A | 226 | 348 | 64.9% | 0 | 93 | ENSMUST00000168033.3; c.293G>T   | p.Arg98Ile   | ENSMUSG00000091945; Vmn2r114 |
| chr17 | 23530117  | C | G | 221 | 344 | 64.2% | 0 | 93 | ENSMUST00000168033.3; c.289G>C   | p.Val97Leu   | ENSMUSG00000091945; Vmn2r114 |
| chr17 | 23530182  | A | G | 155 | 269 | 57.6% | 0 | 93 | ENSMUST00000168033.3; c.224T>C   | p.Val75Ala   | ENSMUSG00000091945; Vmn2r114 |
| chr17 | 23530186  | T | A | 153 | 264 | 58.0% | 0 | 93 | ENSMUST00000168033.3; c.220A>T   | p.Asn74Tyr   | ENSMUSG00000091945; Vmn2r114 |
| chr17 | 23530192  | A | G | 142 | 249 | 57.0% | 0 | 93 | ENSMUST00000168033.3; c.214T>C   | p.Tyr72His   | ENSMUSG00000091945; Vmn2r114 |
| chr17 | 45879194  | G | A | 7   | 61  | 11.5% | 0 | 47 | ENSMUST00000024739.14; c.2026C>T | p.His676Tyr  | ENSMUSG00000023944; Hsp90ab1 |
| chr17 | 45879196  | G | A | 7   | 59  | 11.9% | 0 | 48 | ENSMUST00000024739.14; c.2024C>T | p.Thr675Ile  | ENSMUSG00000023944; Hsp90ab1 |
| chr17 | 45879205  | T | A | 7   | 56  | 12.5% | 0 | 46 | ENSMUST00000024739.14; c.2015A>T | p.Asp672Val  | ENSMUSG00000023944; Hsp90ab1 |

**Supplemental Table S2. Mutations in a single cell-derived HSC colony.** Related to Fig. 3.

Nonsynonymous mutations (indels and single nucleotide variations (SNPs)) detected in an HSC clone expanded over a period of 28 days. Whole exome sequencing (WES) was performed on the expanded clone and the parent population from which the clone was derived. Both samples were compared to the murine reference genome, and only mutations detected in the expanded clone and not in the parent population were considered.

| Chromosome | Position  | Reference | Allele | Count | Coverage | Frequency | Transcript affected                                | AA change in longest transcript | Gene                     |
|------------|-----------|-----------|--------|-------|----------|-----------|----------------------------------------------------|---------------------------------|--------------------------|
| chr5       | 147293801 | AT        | A      | 38    | 40       | 95.0%     | ENSMUST00000049324.13; c.1313-40delA               | None (intron_variant)           | ENSMUSG00000042817; FLT3 |
| chr5       | 147294645 | CT        | C      | 6     | 18       | 33.3%     | ENSMUST00000049324.13; c.1312+112delA              | None (intron_variant)           | ENSMUSG00000042817; FLT3 |
| chr1       | 65198550  | TA        | T      | 16    | 36       | 44.4%     | ENSMUST00000097709.11; c.*73delT                   | None (3_prime_UTR_variant)      | ENSMUSG00000025950; IDH1 |
| chr7       | 79745297  | TG        | T      | 6     | 34       | 17.6%     | ENSMUST00000107384.10; c.1271+71delC               | None (intron_variant)           | ENSMUSG00000030541; IDH2 |
| chr7       | 79748080  | CCCAGGG   | C      | 24    | 24       | 100.0%    | ENSMUST00000107384.10;<br>c.679-66_679-61delCCCTGG | None (intron_variant)           | ENSMUSG00000030541; IDH2 |

**Supplemental Table S3. Screen for sequence variants in critical genes in a gene edited and transplanted HSC clone.** Related to Fig. 4.

Gene-edited CD45.1<sup>+</sup>cKit<sup>+</sup>Lin<sup>-</sup> cells were recovered from the bone marrow of CD45.2<sup>+</sup> secondary recipients of a single cell-derived HSC graft, followed by WES analysis. We checked several known tumor-associated genes for sequence variants: TP53, FLT3, NPM1, IDH1, IDH2, EVI1, TET2, RUNX1, EZH2 and DNMT3A. Since the parent population was not available, sequences were compared to the mouse reference genome. Therefore, it is possible that some of these variants are part of the genomic background of the mouse strain and have not been acquired during the editing and single cell expansion process.

**Supplemental Table 4. Oligonucleotides used in this study.** Related to STAR Methods.

Sequences of DNA and RNA oligos used in this work.

| Sequence                                                                                                                                                                               | Source                   | Identifier                     |
|----------------------------------------------------------------------------------------------------------------------------------------------------------------------------------------|--------------------------|--------------------------------|
| <b>Synthetic guide RNA (sgRNA) (mN*: Phosphorothioated 2'-O-methyl RNA base)</b>                                                                                                       |                          |                                |
| mC*mU*mU*ACCAAGUUAUAACAGCUGUUUUAGAGCUAGAAUAGCAAGUUAAAAUAAGGCUAGUCCGUUAUCAACUUGAAAA<br>AGUGGCACCCGAGUCGGUGCmU*mU*mU*U                                                                   | This study               | Prkdc_gRNA1                    |
| mA*mU*mA*CUUCAUUUGUUUGGAGGUUUUAGAGCUAGAAUAGCAAGUUAAAAUAAGGCUAGUCCGUUAUCAACUUGAAAA<br>AGUGGCACCCGAGUCGGUGCmU*mU*mU*U                                                                    | This study               | Ptprc_gRNA1                    |
| mU*mG*mC*CCCACAGGGCAGUAAGUUUUAGAGCUAGAAUAGCAAGUUAAAAUAAGGCUAGUCCGUUAUCAACUUGAAAAAG<br>UGGCACCCGAGUCGGUGCmU*mU*mU*U                                                                     | DeWitt et al., 2016 [S1] | HBB_gRNA10                     |
| <b>Single-strand oligodeoxynucleotide (ssODN) HDR templates (N*: Phosphorothioated DNA base)</b>                                                                                       |                          |                                |
| G*G*A*TTCAAGAAATAAATGTAACGGAAAAGAATTGGTATCCACAACATAAAATACGCTATGCTAAGAGGAAGTTAGCAGGT<br>GCCAATCCAGCTGTTATAACTTGGTAAGACTTGTGAATGCAGAA*T*C*A                                              | This study               | Prkdc_HDR_ssODN_asym           |
| T*G*C*CCAGCATCGTACCTGGCTCACAGTGGAGTACATATGAAATATTGTCACTGTTGCATTTTCTGAAATCAAGGTTTTCT<br>GTCTTCCATTCCAAACAAATGGAAGTATTAGCCTTTTTCTTTTGG*T*G*T                                             | This study               | Ptprc_HDR_ssODN_asym           |
| T*C*AGGGCAGAGCCATCTATTGCTTACATTTGCTTCTGACACAACCTGTGTTCACTAGCAACCTCAAACAGACACCATGGTGC<br>ACCTGACTCCTGTAGAGAAGTCTGCGGTTACTGCCCTGTGGGGCAAGGTGAACGTGGATGAAGTTGGTGGTGGAGGCCCTGGGC<br>AG*G*T | This study               | HBB_HDR_ssODN_asym             |
| <b>PCR and sequencing primers (FAM-: 5' 6-carboxyfluorescein label)</b>                                                                                                                |                          |                                |
| CTTTGTTTTAGGGTCATTACTTGGT                                                                                                                                                              | This study               | Prkdc_inner_F                  |
| TGCTCAGAACTGAAGTCTAAGGT                                                                                                                                                                | This study               | Prkdc_inner_R                  |
| CAATTATCCAGACTATCCCCGAAA                                                                                                                                                               | This study               | Prkdc_outer_F                  |
| TCTTGCCTACACCCTGTAAAGC                                                                                                                                                                 | This study               | Prkdc_outer_R                  |
| TCCCTCTAGAAGCACTTGTT                                                                                                                                                                   | This study               | Ptprc-e7-F                     |
| CCCCTAGCGAAATCTCCTGC                                                                                                                                                                   | This study               | Ptprc-e7-R                     |
| AGCGGAAGGGCAACTTTACTA                                                                                                                                                                  | This study               | OT_01_outer_F                  |
| GATCTCATAACAGACAGGGAAG                                                                                                                                                                 | This study               | OT_01_inner_F                  |
| GCATACGCCATTCTGCTCAC                                                                                                                                                                   | This study               | OT_01_inner_R_SEQ <sup>a</sup> |
| TGCCTGTATGGTAAGCACCC                                                                                                                                                                   | This study               | OT_02_inner_F_SEQ <sup>a</sup> |
| TTAGTGGCAGGCATGCTTCA                                                                                                                                                                   | This study               | OT_02_outer_R                  |
| AGTCACCATTCTGTGTCCC                                                                                                                                                                    | This study               | OT_02_inner_R                  |
| TGGATCTTGTTTCATCTGGGGC                                                                                                                                                                 | This study               | OT_03_inner_F_SEQ <sup>a</sup> |
| GCCTGAGGGACTCAGTATTGT                                                                                                                                                                  | This study               | OT_03_outer_R                  |
| AGATTTCAAGATGTCCTTACGA                                                                                                                                                                 | This study               | OT_03_inner_R                  |
| TATTAGCACCTACCCAATGCT                                                                                                                                                                  | This study               | OT_04_outer_F                  |
| GTGGCACAAAGAAAGATGTATGG                                                                                                                                                                | This study               | OT_04_inner_F                  |
| TGCAGTCCTTGTAAAGGGT                                                                                                                                                                    | This study               | OT_04_inner_R_SEQ <sup>a</sup> |
| GATGCAGCTGAGACTCGT                                                                                                                                                                     | This study               | OT_05_inner_F_SEQ <sup>a</sup> |

|                            |                         |                                |
|----------------------------|-------------------------|--------------------------------|
| CACTCCCTGTGTGTTTGTTC       | This study              | OT_05_inner_R                  |
| AGTAGGCTTTGTAGGCACGC       | This study              | OT_05_outer_R                  |
| CGACAACACTCTGACTCCCATA     | This study              | OT_06_outer_F                  |
| CCTTTCCCTTGGGTA CTCTTG     | This study              | OT_06_inner_F                  |
| TGCAAATGACCGAAATCTGTAAA    | This study              | OT_06_inner_R                  |
| GCCCTCAAGATTTGCTGTCAAG     | This study              | OT_06_SEQ <sup>a</sup>         |
| TACCTTCTCACAAGCAGGGAGG     | This study              | OT_07_outer_F                  |
| GAGGAGCCTTATGGAAAGATTG     | This study              | OT_07_inner_F                  |
| TTAAGGCATTCCGTCTGCCA       | This study              | OT_07_inner_R_SEQ <sup>a</sup> |
| CTGAATGCCCAGACAGCTCCAAGC   | Ahmed et al., 2009 [S2] | TCR-Vb1                        |
| CATTACTCATATGTCGCTGAC      | Ahmed et al., 2009 [S2] | TCR-Vb8.1                      |
| TGCTGGCAACCTTCGAATAGGA     | Ahmed et al., 2009 [S2] | TCR-Vb8.3                      |
| TCTCTCTACATTGGCTCTGCAGGC   | Ahmed et al., 2009 [S2] | TCR-Vb9                        |
| CTTGGGTGGAGTCACATTTCT      | Ahmed et al., 2009 [S2] | TCR-Cb                         |
| FAM-CTTGGGTGGAGTCACATTTCT  | Ahmed et al., 2009 [S2] | TCR-Cb-FAM                     |
| AACTTGGTAAGACTTGTGAATGC    | This study              | Prkdc_dd_00-2_F                |
| ACACAGTGAAGTGCCATACT       | This study              | Prkdc_dd_00-2_R                |
| GAAGAGGGAGCACCTGAATTA      | This study              | Prkdc_dd_5p-500-1_F            |
| TGTTCTTACAGAGGACCAACC      | This study              | Prkdc_dd_5p-500-1_R            |
| TCAGTTCTGAGCAGTAGTAAGATG   | This study              | Prkdc_dd_3p-500-1_F            |
| ATTGATTTCTGCAGCTCATTCTC    | This study              | Prkdc_dd_3p-500-1_R            |
| GCTCACTGACACCATGGAAA       | This study              | Prkdc_dd_5p-1000-1_F           |
| TCACAATCCAAAGGAGACATGA     | This study              | Prkdc_dd_5p-1000-1_R           |
| TGGTTCTTCCACCTCCAATC       | This study              | Prkdc_dd_3p-1000-3_F           |
| CATGATGCCTATGTCTGAGGAG     | This study              | Prkdc_dd_3p-1000-3_R           |
| GCCCCAGCACGACCATT          | This study              | Dot11_dd_1_F                   |
| TAGTTGGCATCCTTATGCTTCATC   | This study              | Dot11_dd_1_R                   |
| AAGTAACTAATGCACAGACACAT    | This study              | huHBB_outer_F                  |
| AATGTACTAGGCAGACTGTGTAA    | This study              | huHBB_outer_R                  |
| ATGCTTAGAACCGAGGTAGAGTT    | This study              | huHBB_inner_F                  |
| CCTGAGACTTCCACACTGATGC     | This study              | huHBB_inner_R                  |
| ACCATGGTGCATCTGACTC        | This study              | huHBB_00-3_F                   |
| GGTCTCCTTAAACCTGTCTTGT     | This study              | huHBB_00-3_R                   |
| AACGATCTTCAATATGCTTACCAAG  | This study              | huHBB_5p-500-3_F               |
| CCCATACCATCAGTACAAATTGC    | This study              | huHBB_5p-500-3_R               |
| CACGTGGATCCTGAGA ACTT      | This study              | huHBB_3p-500-1_F               |
| CTTCTATGACATGAACTTAACCATAG | This study              | huHBB_3p-500-1_R               |
| GTCCAGGCAGAAACAGTTAGA      | This study              | huHBB_5p-1000-3_F              |
| CAACCCAAAGTGTGACTATCAATG   | This study              | huHBB_5p-1000-3_R              |

|                                                                                      |            |                             |
|--------------------------------------------------------------------------------------|------------|-----------------------------|
| ACTGATGTAAGAGGTTTCATATTGC                                                            | This study | huHBB_3p-1000-1_F           |
| GCCTAGCTTGGACTCAGAATAA                                                               | This study | huHBB_3p-1000-1_R           |
| CTAGGGTTGGCCAATCTACTCC                                                               | This study | huHBB_seqprimer             |
| <sup>a</sup> SEQ denoted off-target PCR primers were also used as sequencing primers |            |                             |
| <b>ddPCR probes (synthesized at IDT)</b>                                             |            |                             |
| CCAGCTCTCAAGTCG                                                                      | This study | Dot11-1_probe (SUN)         |
| TGCAAAGCACTTCACACACTTCTGAGC                                                          | This study | Prkdc_00-2_probe (FAM)      |
| ACCAATGTTTCTGGGACCTGAATGCT                                                           | This study | Prkdc_5p-500-1_probe (FAM)  |
| AGTGTCTAGATCTATACAGTACTGGTGCT                                                        | This study | Prkdc_3p-500-1_probe (FAM)  |
| TGTGAAGGAACCCCTCCTTTGATTGGAAGG                                                       | This study | Prkdc_5p-1000-1_probe (FAM) |
| TCTGTACCTCCGGTTCTAGGGAACCT                                                           | This study | Prkdc_3p-1000-3_probe (FAM) |
| CAAGGTGAACGTGGATGAAGTTGG                                                             | This study | huHBB_00-3_probe (FAM)      |
| CGTAAATACACTTGCAAAGGAGGATGT                                                          | This study | huHBB_5p-500-3_probe (FAM)  |
| AGGGTGAGTCTATGGGACGCTTGA                                                             | This study | huHBB_3p-500-1_probe (FAM)  |
| ACCTCCTATTTGACACCACTGATTACCC                                                         | This study | huHBB_5p-1000-3_probe (FAM) |
| CAGCTACAATCCAGCTACCATTCTGCT                                                          | This study | huHBB_3p-1000-1_probe (FAM) |
|                                                                                      |            |                             |



#### **SUPPLEMENTAL REFERENCES**

- S1. DeWitt, M.A., Magis, W., Bray, N.L., Wang, T., Berman, J.R., Urbinati, F., Heo, S.-J., Mitros, T., Munoz, D.P., Boffelli, D., et al. (2016). Selection-free genome editing of the sickle mutation in human adult hematopoietic stem/progenitor cells. *Sci Transl Med* 8, 360ra134-360ra134. 10.1126/scitranslmed.aaf9336.
- S2. Ahmed, M., Lanzer, K.G., Yager, E.J., Adams, P.S., Johnson, L.L., and Blackman, M.A. (2009). Clonal Expansions and Loss of Receptor Diversity in the Naive CD8 T Cell Repertoire of Aged Mice. *The Journal of Immunology* 182, 784–792. 10.4049/jimmunol.182.2.784.
